1           Applying a Prospective Space-Time Scan Statistic to Examine the  
2           Evolution of COVID-19 Clusters in the State of São Paulo, Brazil.

3   **Authors & Affiliations:** Ferreira, R.V.<sup>1</sup>, Martines, M. R.<sup>2</sup>, Toppa, R. H.<sup>3</sup>, Assunção, L.  
4   M.<sup>4</sup>, Desjardins, M.R.<sup>5</sup> & Delmelle, E.M.<sup>6</sup>

5   <sup>1</sup>Department of Geography, Federal University of Triângulo Mineiro, Uberaba Campus,  
6   State of Minas Gerais, Brazil - Research Group: Center for Studies in Landscape  
7   Ecology and Conservation.

8   <sup>2</sup>Department of Geography, Tourism and Humanities, Federal University of São Carlos,  
9   Sorocaba, SP, Brazil - Research Group: Center for Studies in Landscape Ecology and  
10   Conservation.

11   <sup>3</sup>Department of Environmental Sciences, Federal University of São Carlos, Sorocaba,  
12   SP, Brazil - Research Group: Center for Studies in Landscape Ecology and  
13   Conservation.

14   <sup>4</sup>Faculty of Law, State University of Minas Gerais, Ituiutaba Campus, Brazil.

15   <sup>5</sup>Department of Epidemiology, Spatial Science for Public Health Center, Johns Hopkins  
16   Bloomberg School of Public Health, Baltimore, MD, USA, 21205

17   <sup>6</sup>Department of Geography and Earth Sciences, Center for Applied Geographic  
18   Information Science, University of North Carolina at Charlotte, Charlotte, NC, USA,  
19   28223

20  
21   **Abstract**

22   We present the first geographic study that uses space-time statistics to monitor COVID-  
23   19 in Brazil. The first cases of COVID-19 were confirmed in December 2019 in Wuhan,  
24   China, caused by the contamination of the SARS-CoV-2 virus, and quickly turned into a  
25   pandemic. In Brazil, the first case occurred on January 23rd, 2020 but was officially  
26   reported by the Brazilian Ministry of Health on February 25th. Since then, the number  
27   of deaths and people infected by COVID-19 in Brazil have been steadily increasing.  
28   Despite the underreporting of coronavirus cases by government agencies across the  
29   country, the State of São Paulo has the highest rate among all Brazilian States. Thus, it  
30   is essential to detect which areas contain the highest concentration of COVID-19 to  
31   implement public policies, to mitigate the spread of the epidemic. To identify these  
32   critical areas, we utilized daily confirmed case data from the Brasil.IO website between  
33   February 25<sup>th</sup>, 2020 to May 5<sup>th</sup>, 2020; which were aggregated to the municipality level.  
34   A prospective space-time scan statistic was applied to evaluate possible active clusters  
35   in three different time periods. The results visualize the space-time evolution and  
36   dynamics of COVID-19 clusters in the State of São Paulo. Since the first study period,  
37   the results highlight approximately 4.6 times the number of municipalities belonging to  
38   a significant cluster with a  $RR > 1$  on May 5<sup>th</sup>. These results can inform health  
39   authorities and public management to take the necessary measures to minimize the  
40   transmission of COVID-19 and track the evolution of significant space-time clusters.

41   **Keywords:** Relative risk, Space-time statistics, COVID-19, Geographic Information  
42   Systems, Disease surveillance

43   **Funding:** The authors received no specific funding for this work.

44

45 **HIGHLIGHTS**

- 46 • Prospective space-time statistics can improve COVID-19 surveillance in Brazil
- 47 • All statistically significant clusters are located near São Paulo Municipality
- 48 • There are municipalities with relative risk highest than one in the countryside
- 49 • 4.6 times the number of municipalities belong to a significant cluster on May 5th

50

51

52

53

54

55

56

57

58

59

60

61

62

63

64

65

66

67

68

69

70

71

72

73

74

75 **Introduction**

76           After five months of the novel coronavirus disease's (COVID-19) first  
77 identification in Wuhan city (Hubei province, China) in December of 2019, a new  
78 research reports the virus was already spreading late December 2019 in Paris, in a  
79 patient that not visited Wuhan, indicating that the epidemic started earlier (Deslandes, et  
80 al. 2020). The World Health Organization (WHO) declared COVID-19 as a pandemic  
81 on March 11th, 2020 (WHO, 2020). As of May 14th, 2020, there are over 4.3 million  
82 confirmed cases and almost 300,000 deaths, globally (Dong et al. 2020). The  
83 asymptomatic rate of may be between 40%-60% (He et al. 2020; Nishiura et al. 2020),  
84 essentially indicating that a large proportion of infected individuals are "silent carriers".  
85 Furthermore, the basic reproductive number ( $R_0$ ) is estimated between 1.4 and 6.49,  
86 making the SARS-CoV-2 virus substantially more contagious than influenza and other  
87 coronaviruses like MERS-CoV and SARS-CoV (Liu et al. 2020). Symptomatic cases  
88 are mostly mild (approximately 80%), while severe cases include clinical manifestations  
89 such as pneumonia, multi-organ failure, and death (Ruan et al. 2020; Mahase 2020).

90           The highest proportion of deaths occur in the elderly, immunocompromised  
91 populations, and those with preexisting conditions such as heart disease and  
92 hypertension (Wu and McGoogan 2020). Conversely, severe outcomes and deaths have  
93 also been reported in children, (Deyà-Martínez et al. 2020; Fabre et al. 2020; Jones et al.  
94 2020). Furthermore, there is currently no known level of immunity to SARS-CoV-2  
95 (Osman et al. 2020), therefore, spatiotemporal surveillance of COVID-19 can be a  
96 powerful tool to mitigate transmission risk (Yang et al. 2020). In this study, we focus  
97 our efforts on the State of São Paulo, Brazil.

98           Brazil reported the first case on January 23rd 2020, in São Paulo Municipality,  
99 but the precise time in which the virus began to spread locally is currently unknown, but  
100 probably started to spread locally before the date set by the government (Delatorre et. al.

101 2020). However, the Brazilian Ministry of Health reported officially that the first case  
102 occurred on February 25th, 2020, in São Paulo State (Brasil, 2020a). The World Health  
103 Organization (WHO) declared COVID-19 a pandemic on March 11th, 2020 (WHO,  
104 2020). In Brazil on May 11th, 2020, there were 162,622 confirmed cases, 11,123  
105 confirmed deaths, and a lethality rate of 6.8% (Brasil, 2020b). However, a high  
106 underreporting of deaths is expected due to testing lags and lack of testing resources and  
107 utilization (Alonso et al. 2020). Even more critical is that Brazil exhibits one of the  
108 highest transmission rate among the 48 countries surveyed by the Imperial College of  
109 London (BHATIA, 2020). Large cities such as São Paulo and Rio de Janeiro are  
110 emerging as the main epicenters of the epidemic (The Lancet Editorial, 2020). There are  
111 indications of faster spreading within the State of São Paulo (FIOCRUZ, 2020), where  
112 smaller population municipalities have limited access to hospital care.

113         Monitoring the spread of COVID-19 is essential to develop health strategies,  
114 such as making tests and hospital beds available. The prospective space-time scan  
115 statistic (Kulldorff, 1997) is a powerful exploratory approach for detecting active and  
116 emerging clusters of disease, identifying locations that are currently experiencing excess  
117 incidence of cases on the most recent time period in a dataset. The statistic determines  
118 if the observed space-time patterns of disease are randomly distributed or exhibit  
119 statistically significant clustering. It utilizes cylindrical scanning windows of different  
120 spatial and temporal dimensions to systematically scan the study area and period for  
121 excess incidence of disease cases (e.g. more observed than expected cases given  
122 baseline conditions). The prospective version of the scan statistic will disregard clusters  
123 that may have previously existed and only detect clusters that are an active and  
124 emerging public health threat (Kulldorff 2001). This is different than the retrospective  
125 space-time scan statistic, which detects clusters at any point during the study period,

126 regardless when the clusters “disappear” (Desjardins et al. 2018; Owusu et al. 2019;  
127 Whiteman et al. 2019).

128       Regarding COVID-19 surveillance, the prospective space-time scan statistic has  
129 been applied to daily case data at the municipality level in the United States, analyzing a  
130 65-day period as well as active and emerging clusters (Desjardins et al., 2020). This  
131 approach could inform decision makers to improve resource allocation and justify  
132 continued social distancing and stay-at-home orders. It is essential to clarify that this  
133 type of study can be repeated when more data is available, as to support the COVID-19  
134 surveillance (Desjardins et al., 2020). In Brazil, as the State Health Secretariats (SHS)  
135 are updating the data daily and making them public, researchers will be able to locate  
136 new emerging clusters, as well as indicate the areas in which the COVID-19’s  
137 transmission has decreased.

138       Regarding COVID-19 surveillance efforts in Brazil, the Ministry of Health  
139 reports daily confirmed cases and deaths; while also developing a COVID-19 app and  
140 WhatsApp channel (de Oliveira et al. 2020). Tarrataca et al. (2020) applied a  
141 susceptible, exposed, infected, removed (SEIR) model and developed several lockdown  
142 scenarios and lack thereof. Another study in Brazil estimated the number of  
143 underreported cases and deaths (Riberio and Bernardes 2020). However, there is  
144 currently a lack of spatially explicit studies in Brazil, especially space-time cluster  
145 detection of the known burden of COVID-19 across the country at the municipality  
146 level.

147       In this research we by the abovementioned app by analyzing the State of São  
148 Paulo, the most affected by COVID-19 in Brazil, that registered 43,131 cases (25.6%)  
149 of the 168,331 on May 12th, 2020, (Brasil, 2020b). Utilizing a prospective space-time  
150 scan statistic, our objective was to detect new emerging clusters of COVID-19 in the

151 State of São Paulo’s municipalities, considering three periods of analysis: (1) February  
152 25th – March 24th, 2020; (2) February 25th – April 15th, 2020; and (3) February 25th  
153 – May 5th, 2020. Examining these three periods, we intend to demonstrate the evolution  
154 of the relative risk in different regions and municipalities in the State of São Paulo.

## 155 **Data and Methods**

156 On March 1st, 2020, the Health Surveillance Secretary of the Ministry of Health  
157 of Brazil stated that a COVID-19 case is defined as confirmed if tested in a laboratory  
158 with a positive result in real-time with Reverse-Transcriptase Polymerase Chain  
159 Reaction (RT-PCR) test, following the protocol of the University Charité (Berlin,  
160 Germany). Real time RT-PCR is a nuclear-derived method for detecting the presence of  
161 specific genetic material from any pathogen, including a virus - scientists can see the  
162 results almost immediately while the process is still ongoing; conventional RT-PCR  
163 only provides results at the end. In Brazil, the notification system is decentralized, and  
164 the municipalities can proceed with tests in private or public laboratories. Then, the  
165 results are notified to the State Health System, which in turn notifies the national  
166 Government.

167 The State of São Paulo has approximately 45.9 million inhabitants and an area  
168 of 95.8 square miles. On March 24th, the Governor of São Paulo decreed social  
169 distancing to prevent the spread of the novel coronavirus. As the incubation period for  
170 the novel coronavirus disease (COVID-19) is well supported by evidence to be around  
171 14 days (Lauer, et. al. 2020), we selected three separate space-time analyses: from  
172 February 25th to March 24th, from February 25th to April 15th, and from February 25th  
173 to May 5th, 2020 – which includes five incubation periods of onset of the most current  
174 COVID-19 case in the dataset (Figure 1).

175 We utilized confirmed daily case data at the municipality level in the State  
176 Health Secretary of São Paulo's freely available on its official page (São Paulo, 2020a).  
177 The data contains information on 645 municipalities of the State of São Paulo and is  
178 updated daily, although we only use records between February 25th, 2020 and May 5th,  
179 2020. We used a Geographic Information System to geocode the locations of COVID-  
180 19 cases and aggregated them to the available municipalities. The municipality-level  
181 GIS files were retrieved from the Instituto Brasileiro de Geografia e Estatística (IBGE);  
182 English – The Brazilian Institute of Geography and Statistics.

183 The detection of active clusters was performed using the Poisson space-time  
184 scan statistic method (Kuldorff, 2001). Analyses were done using SaTScan, a free  
185 software developed for cluster detection. The prospective space-time statistic detects  
186 active clusters of disease, i.e. excess incidence of cases during the last time period of  
187 analysis (Jones et. al, 2006). The statistic systematically implements moving cylinders  
188 to scan the study area. The cylinders are centered on the centroid of the municipalities,  
189 the base of the cylinder is the spatial scanning window, and the height represents the  
190 temporal scanning window. The cylinders are expanded until a maximum spatial and  
191 temporal upper bound is reached. We defined the upper bounds to have a maximum  
192 spatial and temporal scanning window size of 10% of the population at-risk to avoid  
193 extremely large clusters; and 50% of the study period, respectively. Each cluster's  
194 duration was set to a minimum of 2 days and a cluster must contain a minimum of five  
195 confirmed cases of COVID-19 (Desjardins et al. 2020).

196 We used a prospective Poisson model to detect space-time clusters that are still  
197 occurring or active on the last day of analysis (Kuldorff, 2001; Kuldorff et al., 1998;  
198 Desjardins et al. 2020). We assume that the COVID-19 cases in our study area follow a  
199 Poisson distribution. While the null hypothesis states that the model reflects a constant

200 risk (i.e. no anomalous clustering of COVID-19). The alternative hypothesis states that  
201 the number of observed cases exceed the number of expected cases derived from the  
202 null model. The expected cases are calculated by multiplying the population in the  
203 cylinder by the total COVID-19 rate in the cylinder (i.e.  $p * C/p$ ). We assume that the  
204 population is static for time period.

205         Next, a maximum likelihood ratio test identifies cylinders with an elevated risk  
206 for COVID-19. The cylinder has an elevated risk when the likelihood ratio is greater  
207 than one; where the rate of cases in the cylinder is greater than the rate outside of the  
208 cylinder. To derive statistical significance, 999 Monte Carlo simulations are computed,  
209 while we report clusters at the 95% confidence level (i.e.  $p < 0.05$ ). Therefore, 999  
210 likelihood ratios are computed for each cylinder, where each are a potential cluster.

211         To circumvent the issue of assuming the municipalities belonging to a cluster  
212 are homogenous, we also report and map the relative risk for each municipality in each  
213 study period. The relative risk is defined the estimated risk of COVID-19 within a  
214 municipality divided by the risk outside of the municipality (i.e. everywhere else). As  
215 the pandemic continues, new data can be added the prospective space-time scan statistic  
216 to monitor active clusters and identify areas that no longer are experiencing excess  
217 incidence based on available confirmed cases (i.e. areas that no longer have an excess  
218 public health risk).

219



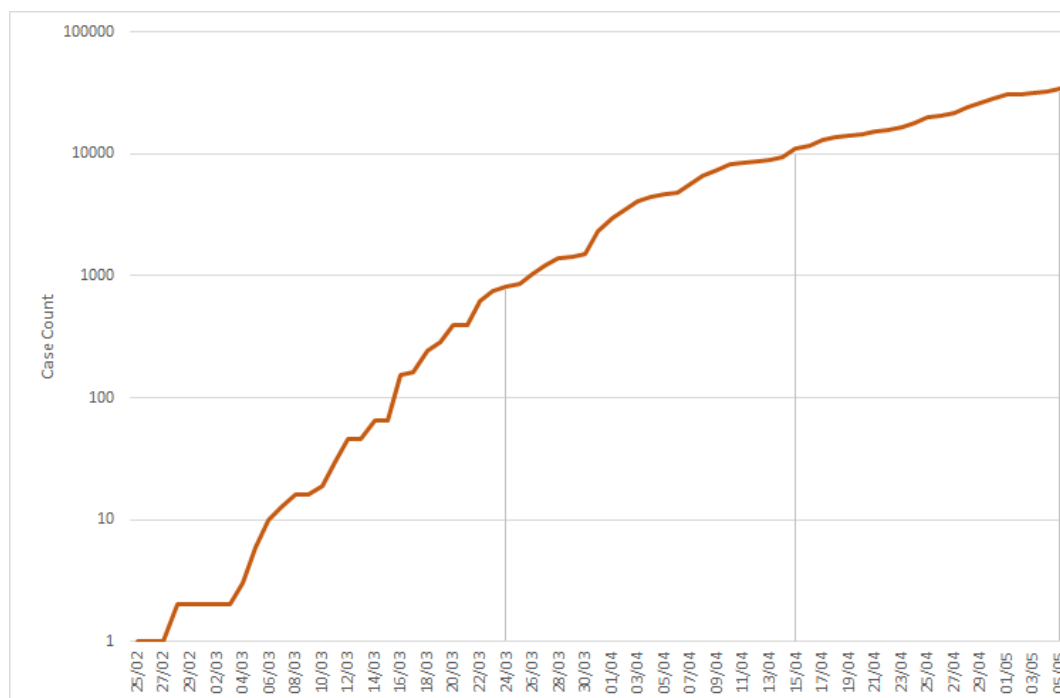

220

221 Figure 1. Logarithmic graph of cumulative number of COVID-19 cases in the State of  
222 São Paulo between February 25th and May 5th, 2020 (used for the statistical analysis)

## 223 Results

### 224 First period of analysis – February 25th – March 24th, 2020

225 We did not detect any statistically significant emerging space-time clusters of  
226 COVID-19 between the first period of analysis – 28 days, two incubation periods –  
227 (Figure 2A). However, we observed five municipalities with a  $RR > 1$  outside the cluster  
228 for this first period, that is, with more observed than expected cases (Table 1). *São*  
229 *Paulo* Municipality has the highest relative risk ( $RR = 28.03$ ), followed by *São Caetano*  
230 *do Sul* ( $RR = 3.42$ ), *Jaguariúna* ( $RR = 2.38$ ), *Santana de Parnaíba* ( $RR = 1.97$ ) and  
231 *Cotia* ( $RR = 1.1$ ).

232

233

234

235

236

237 Table 1. Municipalities of São Paulo State, Brazil, with relative risk (RR) >1,  
238 observed/expected cases and population, within the time period between February 25th  
239 and March 24th, 2020.

| <i>Municipality</i> | <i>Population</i> | <i>Observed cases</i> | <i>Expected cases</i> | <i>RR</i> |
|---------------------|-------------------|-----------------------|-----------------------|-----------|
| São Paulo           | 12,252,023        | 306                   | 89.65                 | 28.03     |
| São Caetano do Sul  | 161,127           | 4                     | 1.18                  | 3.42      |
| Jaguariúna          | 57,488            | 1                     | 0.42                  | 2.38      |
| Santana de Parnaíba | 139,447           | 2                     | 1.02                  | 1.97      |
| Cotia               | 249,210           | 2                     | 1.82                  | 1.1       |

240

241 **Second period of analysis – February 25th – April 15th, 2020**

242 We detected seven statistically significant emerging space-time clusters of  
243 COVID-19 in São Paulo State for this second period of analysis (50 days,  
244 approximately three incubation periods), which included 353 municipalities. In this  
245 second period there were two observed clusters with a RR>1 (cluster 1 – RR=3.29; and  
246 cluster 3 – RR=2.64), including 11 and 17 municipalities, respectively (Table 2). Both  
247 are located in the East region of São Paulo State, near São Paulo Municipality (Figure  
248 2B).

249 Cluster 1 has 943 observed cases, and *São Caetano do Sul* Municipality has the  
250 highest relative risk (RR = 2.23) with 85 observed cases for 38.34 expected cases,  
251 followed by *Santos* Municipality (RR=2.12 with 216 observed cases for 103.11  
252 expected cases). *São Bernardo do Campo* Municipality is also in cluster 1 (RR=1.16),  
253 and *Santo André* Municipality (RR=1.09) with RR>1. Cluster 3 contains 17  
254 municipalities including six municipalities with a RR>1 and 641 observed cases (Table  
255 2). *Caieiras* Municipality has the highest relative risk (RR=1.74), followed by *Taboão*  
256 *da Serra* (RR=1.34), *Santana de Parnaíba* (RR=1.24), *Cotia* (RR=1.18), *Franco da*  
257 *Rocha* (RR=1.12), and *Osasco* (RR=1.04).

258

259

260

261 Table 2. Emerging space-time clusters of COVID-19 from February 25th – April 15th,  
 262 2020 show the relative risks (RR) for the clusters identified in the São Paulo State,  
 263 Brazil.

| <i>Cluster</i> | <i>Duration</i> | <i>P</i> | <i>Observed cases</i> | <i>Expected cases</i> | <i>RR</i> | <i># of municipalities</i> | <i>Population</i> | <i># of municipalities with RR&gt;1</i> |
|----------------|-----------------|----------|-----------------------|-----------------------|-----------|----------------------------|-------------------|-----------------------------------------|
| 1              | 3/30-4/15       | <0.001   | 943                   | 305.05                | 3.3       | 11                         | 3,845,800         | 4                                       |
| 2              | 3/22-4/15       | <0.001   | 118                   | 522.04                | 0.2       | 203                        | 4,475,331         | 2                                       |
| 3              | 3/31-4/15       | <0.001   | 641                   | 252.45                | 2.6       | 17                         | 3,381,536         | 6                                       |
| 4              | 3/22-4/15       | <0.001   | 86                    | 421.67                | 0.2       | 61                         | 3,614,906         | 0                                       |
| 5              | 3/22-4/15       | <0.001   | 22                    | 168.99                | 0.1       | 33                         | 1,448,732         | 0                                       |
| 6              | 3/22-4/15       | <0.001   | 36                    | 127.66                | 0.3       | 9                          | 1,094,410         | 0                                       |
| 7              | 3/22-4/15       | <0.001   | 21                    | 96.37                 | 0.2       | 19                         | 826,174           | 0                                       |

264

265 **Third period of analysis – February 25th – May 5th, 2020**

266 We detected seven statistically significant emerging space-time clusters of  
 267 COVID-19, in our third period of our analysis (70 days, five incubation periods),  
 268 covering 513 municipalities of the *São Paulo* State. Clusters 1, 2, and 5 show the  
 269 highest relative risks (Table 3) with a RR=3.71, RR=3.12, and RR=2.68, respectively.  
 270 All of them are located near *São Paulo* Municipality, in the East region of the State  
 271 (Figure 2C).

272 Cluster 1 includes 11 municipalities with a RR>1 and the highest relative risk  
 273 observed is *Barueri* Municipality (RR=2.03). Cluster 2 has five municipalities with a  
 274 RR>1 and *São Caetano do Sul* Municipality has the highest relative risk (RR=1.84).  
 275 Cluster 5 has two municipalities with a RR>1 and *Igaratá* Municipality is the highest  
 276 relative risk (RR=1.84). All the previously mentioned municipalities border with *São*  
 277 *Paulo* Municipality, such as *Barueri* and *São Caetano do Sul*, with the exception of  
 278 *Igaratá* Municipality, which is located nearly 100 kilometers away from *São Paulo* by  
 279 road.

280 Table 3. Emerging space-time clusters of COVID-19 from February 25th – May 5th,  
 281 2020 show the relative risk (RR) for the clusters detected in São Paulo State, Brazil.

| Cluster | Duration | P      | Observed cases | Expected cases | RR  | # of municipalities | Population | # of municipalities with RR>1 |
|---------|----------|--------|----------------|----------------|-----|---------------------|------------|-------------------------------|
| 1       | 4/15-5/5 | <0.001 | 2,598          | 741.98         | 3.7 | 17                  | 3,381,536  | 11                            |
| 2       | 5/15-5/5 | <0.001 | 2,899          | 985.48         | 3.1 | 14                  | 4,491,304  | 5                             |
| 3       | 5/1-5/5  | <0.001 | 534            | 1,641.67       | 0.3 | 87                  | 4,489,123  | 0                             |
| 4       | 4-1-5/5  | <0.001 | 583            | 1,660.57       | 0.3 | 263                 | 4,540,784  | 2                             |
| 5       | 4-24-5/5 | <0.001 | 1,118          | 425.91         | 2.7 | 15                  | 3,396,868  | 2                             |
| 6       | 4-1-5/5  | <0.001 | 758            | 1,635.26       | 0.4 | 85                  | 4,471,575  | 3                             |
| 7       | 4/1-5/5  | <0.001 | 108            | 485.36         | 0.2 | 32                  | 1,327,200  | 0                             |

282

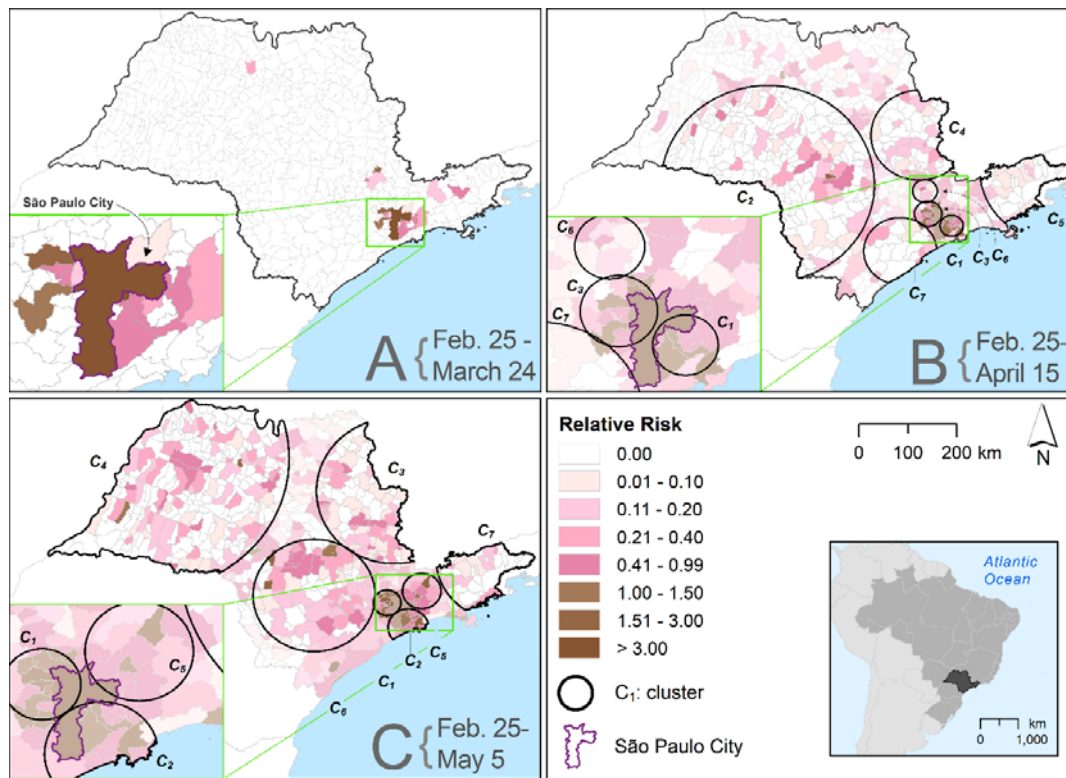

283

284 Figure 1. Spatial distribution of emerging space-time clusters of COVID-19 for the  
 285 municipalities of São Paulo State, Brazil. A – First period of analysis – February 25th –  
 286 March 24th, 2020 (28 days). B – Second period of analysis – February 25th – April  
 287 15th, 2020 (50 days; C1 – RR=3.29; C3=2.64; the other clusters did not show a RR>1).  
 288 C – Third period of analysis – February 25th – May 5th, 2020 (70 days; C1 – RR=3.71;  
 289 C2 – RR=3.12; C5 – RR=2.68; the other clusters did not show a RR>1).

290

291

292

## 293 **Discussion**

294           In this paper, we adapted the methodology used by Desjardins et al. (2020),  
295 using three periods to detected emerging clusters of COVID-19 in São Paulo State,  
296 Brazil, utilizing confirmed case data by the Brazil IO (Brasil IO, 2020). It is important  
297 to highlight that the relative risk throughout the *São Paulo* State increased during the  
298 three periods analyzed. In the first period (February 25<sup>th</sup> – March 24<sup>th</sup>, 2020) within 28  
299 days from the first recorded case, we detected only five municipalities with a  $RR>1$  and  
300 in the third period (February 25<sup>th</sup> – May 5<sup>th</sup>, 2020), within 70 days from the first  
301 recorded case, we detected 23 municipalities with a  $RR>1$ . These results show that  
302 within our study period, there are 4.6 times more municipalities with more observed  
303 than expected cases for *São Paulo* State. Our results show that São Paulo Municipality  
304 is a hotspot of COVID-19 and this is highlighted by the location of the clusters with a  
305  $RR>1$  in the second and third periods. However, after 70 days of virus dispersion in the  
306 State of São Paulo, we observed municipalities with a  $RR>1$  in almost all of the  
307 emerging clusters.

308           In the first period analyzed (February 25<sup>th</sup> – March 24<sup>th</sup>, 2020), twenty  
309 municipalities had level of relative risk of COVID-19, but no clusters were detected;  
310 while all municipalities with reported COVID-19 incidence have a population greater  
311 than 50,000 inhabitants. In the second period (February 25<sup>th</sup>- April 15<sup>th</sup>, 2020) and third  
312 period (February 25<sup>th</sup>- May 5<sup>th</sup>, 2020), clusters with a  $RR> 1$  were located around the  
313 municipality of São Paulo. However, in the second period, 25 municipalities with a  
314 population less than 50,000 inhabitants started to exhibit COVID-19 incidence. In the  
315 third period, the number of municipalities with reported COVID-19 incidence increased  
316 to 117, showing the spread to the countryside of the State. This reinforces a recent  
317 discovery by the Fundação Instituto Oswaldo Cruz (FIOCRUZ), where COVID-19 is

318 arriving rapidly in medium-sized municipalities (20 to 50 thousand inhabitants), tending  
319 to generate the growth of transmission cycles for small cities. This is worrisome  
320 because health services are not prepared for this demand, leading to their burden on  
321 urban centers of reference in São Paulo State (FIOCRUZ, 2020).

322 Despite the contributions of our study, there are a few limitations that are worth  
323 pointing out. First, the cylindrical shapes of the cluster detection are likely not the true  
324 shape of the COVID-19 clusters. Second, we utilized lab confirmed case data, which  
325 does not capture the true burden of the epidemic in São Paulo State. We encourage  
326 researchers to examine our results and future work can understand the transmission  
327 dynamics of COVID-19 in the State and identify predictors of the epidemic. Third,  
328 future work can adjust for significant predictors of COVID-19 when computing the  
329 space-time scan statistic Finally, we used a prospective space-time statistical model, so  
330 we disregard clusters that “disappeared” during the study period and were not active on  
331 May 5<sup>th</sup>, 2020.

### 332 **Conclusions**

333 This research presented an analysis of the dynamics of the expansion of  
334 COVID-19 based on the number of daily cases available in Brasil.IO’s database, with  
335 the intent of identifying emerging space-time clusters active in the municipalities of the  
336 State of São Paulo in three different time periods. We detected three significant active  
337 clusters in the State of *São Paulo* on May 5, 2020. Therefore, this space-time approach  
338 to map emerging clusters will allow decision-makers to identify statistically significant  
339 hotspots of COVID-19 cases. Regional Health Departments (DRS) of the State of São  
340 Paulo are responsible for coordinating the activities in regional level. These departments  
341 can use the results to optimize intersectoral coordination and organization of health care  
342 needs, specifically in relation to bed availability and pulmonary mechanical ventilator.  
343 In turn, this can improve the management of resources in the State of São Paulo. These

344 results coupled with stay-home-orders orders (social confinement) can inform  
345 authorities on the impact of such measures to limit the propagation of COVID19 cases.  
346 As such, our results can support restrictive measures of social distancing that can be  
347 taken to minimize viral transmission.

348

349

350

351

352

353

354

355

356

357

358

359

360

361

362

363

364

365

366

367

368

369

370

371

372

373

374 **References**

- 375 Alonso W.J., Schuck-Paim C., Freitas A.R.R., Kupek E., Wuerzius C.R., Negro-  
376 Calduch E., et al. Covid-19 in context: comparison with monthly mortality from  
377 respiratory causes in each Brazilian state. **InterAm J. Med Health** 2020  
378 (<https://iajmh.com/iajmh/article/view/93/107>).
- 379 Bhatia, S. et al. (2020, May, 12). Short-term forecasts of COVID-19 deaths in multiple countries.  
380 Retrieved from <https://mrc-ide.github.io/covid19-short-term-forecasts/index.html>
- 381 Brasil, Ministry of Health (2020a), available in:  
382 [https://www.saude.gov.br/noticias/agencia-saude/46435-brasil-confirma-primeiro-caso-](https://www.saude.gov.br/noticias/agencia-saude/46435-brasil-confirma-primeiro-caso-de-novo-coronavirus)  
383 [de-novo-coronavirus](https://www.saude.gov.br/noticias/agencia-saude/46435-brasil-confirma-primeiro-caso-de-novo-coronavirus). (accessed in May, 12, 2020).
- 384 Brasil, Ministry of Health (2020b). <https://covid.saude.gov.br/> (accessed in May, 12,  
385 2020).
- 386 Brasil.IO: COVID-19 epidemiological bulletins by municipality per day (2020),  
387 available in: <https://brasil.io/dataset/covid19/> (last actualization: May, 05, 2020,  
388 accessed in May 05, 2020).
- 389 Delatorre E, Mir D, Gräf T, Bello G. Tracking the onset date of the community spread  
390 of SARS-CoV-2 in Western Countries [Submitted]. **Mem Inst Oswaldo Cruz** E-pub:  
391 24 Apr 2020. DOI: [10.1590/0074-02760200183](https://doi.org/10.1590/0074-02760200183).
- 392 Desjardins M.R., Hohl A., Delmelle E.M. Rapid surveillance of COVID-19 in the  
393 United States using a prospective space-time scan statistic: Detecting and evaluating  
394 emerging clusters. **Applied Geography**. Volume 118, May 2020, 102202.  
395 <https://doi.org/10.1016/j.apgeog.2020.102202>.
- 396 Desjardins, M. R., Whiteman, A., Casas, I., & Delmelle, E. (2018). Space-time clusters  
397 and co-occurrence of chikungunya and dengue fever in Colombia from 2015 to 2016.  
398 *Acta tropica*, 185, 77-85.
- 399 Deslandes A., Berti V., Tandjaoui-Lambott Y., Chakib Alloui, et al. 2020. SARS-CoV-  
400 2 was already spreading in France in late December 2019. **International Journal of**  
401 **Antimicrobial Agents**. Available online 3 May 2020, 106006.  
402 <https://doi.org/10.1016/j.ijantimicag.2020.106006>.
- 403 Deyà-Martínez, A., Gordón, Y., Molina-Anguita, C., Vlagea, A., Piquer, M., Juan, M.,  
404 ... & Plaza, A. M. (2020). Single-cycle rituximab-induced immunologic changes in  
405 children: Enhanced in neuroimmunologic disease?. *Neurology-Neuroimmunology*  
406 *Neuroinflammation*, 7(4).
- 407 Dong, E., Du, H., & Gardner, L. (2020). An interactive web-based dashboard to track  
408 COVID-19 in real time. *The Lancet Infectious Diseases*.
- 409
- 410 Fabre, A., Morand, A., & Urbina, D. (2020). COVID-19 and Kawasaki Like Disease:  
411 The Known-Known, the Unknown-Known and the Unknown-Unknown.
- 412
- 413 He, X., Lau, E. H., Wu, P., Deng, X., Wang, J., Hao, X., ... & Mo, X. (2020). Temporal  
414 dynamics in viral shedding and transmissibility of COVID-19. *Nature medicine*, 1-4.



- 415  
416 Jones R.C., Liberatore M., Fernandez J.R., Gerber S.I. Use of a prospective space- time  
417 scan statistic to prioritize shigellosis case investigations in an urban jurisdiction. **Public**  
418 **Health Reports**, 121 (2) (2006), pp. 133-139.  
419 <https://doi.org/10.1177/003335490612100206>.
- 420 Jones, V. G., Mills, M., Suarez, D., Hogan, C. A., Yeh, D., Segal, J. B., ... & Mathew,  
421 R. (2020). COVID-19 and Kawasaki disease: novel virus and novel case. *Hospital*  
422 *Pediatrics*, hpeds-2020.
- 423 Kulldorff, M. 1997. A spatial scan statistic. **Communications In Statistics - Theory**  
424 **and Methods**, 26 (6) (1997), pp. 1481-1496. <https://doi.org/10.1111/1467-985X.00186>.
- 425 Kulldorff, M. Prospective time periodic geographical disease surveillance using a scan  
426 statistic *Journal of the Royal Statistical Society: Series A*, 164 (1) (2001), pp. 61-72.  
427 <https://doi.org/10.1111/1467-985X.00186>
- 428 M. Kulldorff, M. SaTScan™ user guide for version 9.6. <https://www.satscan.org/>  
429 (2018)
- 430 Lauer S.A., Grantz, K.H., Bi Q., Jones F.K., Zheng Q., Meredith H.R., Azman A.S.,  
431 Reich N.G., Lessler J. The Incubation Period of Coronavirus Disease 2019 (COVID-19)  
432 From Publicly Reported Confirmed Cases: Estimation and Application. **Ann Intern**  
433 **Med** 2020; 172:577-582. <https://www.acpjournals.org/doi/10.7326/M20-0504>.
- 434 Liu, Y., Gayle, A. A., Wilder-Smith, A., & Rocklöv, J. (2020). The reproductive  
435 number of COVID-19 is higher compared to SARS coronavirus. *Journal of travel*  
436 *medicine*.
- 437 Mahase, E. (2020). Coronavirus: covid-19 has killed more people than SARS and  
438 MERS combined, despite lower case fatality rate. *BMJ*, 368.
- 439 Nishiura, H., Kobayashi, T., Miyama, T., Suzuki, A., Jung, S., Hayashi, K., ... & Linton,  
440 N. M. (2020). Estimation of the asymptomatic ratio of novel coronavirus infections  
441 (COVID-19). *medRxiv*.
- 442 de Oliveira, W.K., Duarte, E., de França, G.V.A., & Garcia, L.P. (2020). How Brazil  
443 can hold back COVID-19. *Epidemiologia e Serviços de Saúde*, 29(2): 1-8.
- 444 Osman, E. E. A., Toogood, P. L., & Neamati, N. (2020). COVID-19: Living through  
445 Another Pandemic. *ACS Infectious Diseases*.
- 446 Owusu, C., Desjardins, M. R., Baker, K. M., & Delmelle, E. (2019). Residential  
447 mobility impacts relative risk estimates of space-time clusters of chlamydia in  
448 Kalamazoo Municipality, Michigan. *Geospatial health*, 14(2).
- 449 Ribeiro, L. C., & Bernardes, A. T. (2020). Estimate of underreporting of COVID-19 in  
450 Brazil by Acute Respiratory Syndrome hospitalization reports. *Nota Técnica. Cedepar,*  
451 *UFMG, Belo Horizonte, MG*.
- 452 Ruan, Q., Yang, K., Wang, W., Jiang, L., & Song, J. (2020). Clinical predictors of  
453 mortality due to COVID-19 based on an analysis of data of 150 patients from Wuhan,  
454 China. *Intensive Care Medicine*, 1-3.

- 455 São Paulo (2020a). Situação Epidemiológica. Retrieved from  
456 [http://www.saude.sp.gov.br/cve-centro-de-vigilancia-epidemiologica-prof.-alexandre-](http://www.saude.sp.gov.br/cve-centro-de-vigilancia-epidemiologica-prof.-alexandre-vranjac/areas-de-vigilancia/doencas-de-transmissao-respiratoria/coronavirus-covid-19/situacao-epidemiologica)  
457 [vranjac/areas-de-vigilancia/doencas-de-transmissao-respiratoria/coronavirus-covid-](http://www.saude.sp.gov.br/cve-centro-de-vigilancia-epidemiologica-prof.-alexandre-vranjac/areas-de-vigilancia/doencas-de-transmissao-respiratoria/coronavirus-covid-19/situacao-epidemiologica)  
458 [19/situacao-epidemiologica](http://www.saude.sp.gov.br/cve-centro-de-vigilancia-epidemiologica-prof.-alexandre-vranjac/areas-de-vigilancia/doencas-de-transmissao-respiratoria/coronavirus-covid-19/situacao-epidemiologica).
- 459 São Paulo (2020b). Adesão ao isolamento social em SP. Retrieved from  
460 <https://www.saopaulo.sp.gov.br/coronavirus/isolamento/>
- 461 Tarrataca, L., Dias, C. M., Haddad, D. B., & Arruda, E. F. (2020). Flattening the curves:  
462 on-off lock-down strategies for COVID-19 with an application to Brazi. *arXiv preprint*  
463 *arXiv:2004.06916*.
- 464 The Lancet Editorial. COVID-19 in Brazil: “So what?” **The Lancet**. vol. 395: May 9,  
465 2020, 1461. [https://doi.org/10.1016/S0140-6736\(20\)31095-3](https://doi.org/10.1016/S0140-6736(20)31095-3).
- 466 Whiteman, A., Desjardins, M.R., Eskildsen, G.A., & Loaiza, J.R. (2019) Integrating  
467 vector surveillance data to improve space-time risk estimation of dengue fever in  
468 Panama. *PLOS Neglected Tropical Diseases*, 13(9): e0007266.
- 469 Wu, Z., & McGoogan, J. M. (2020). Characteristics of and important lessons from the  
470 coronavirus disease 2019 (COVID-19) outbreak in China: summary of a report of 72  
471 314 cases from the Chinese Center for Disease Control and Prevention. *Jama*.
- 472 Yang et al. (2020). Taking the pulse of COVID-19: A spatiotemporal perspective. *arXiv*  
473 *preprint arXiv: 2005.04224v1*.
- 474
- 475
